# Supplementary material for: OrthoInspector: comprehensive orthology analysis and visual exploration
Source: Springer Nature journal article supplement (doi:10.1186/1471-2105-12-11), 2011-01-10
Supplement: 12859_2010_4328_MOESM6_ESM.pdf [file 12859_2010_4328_MOESM6_ESM.pdf]

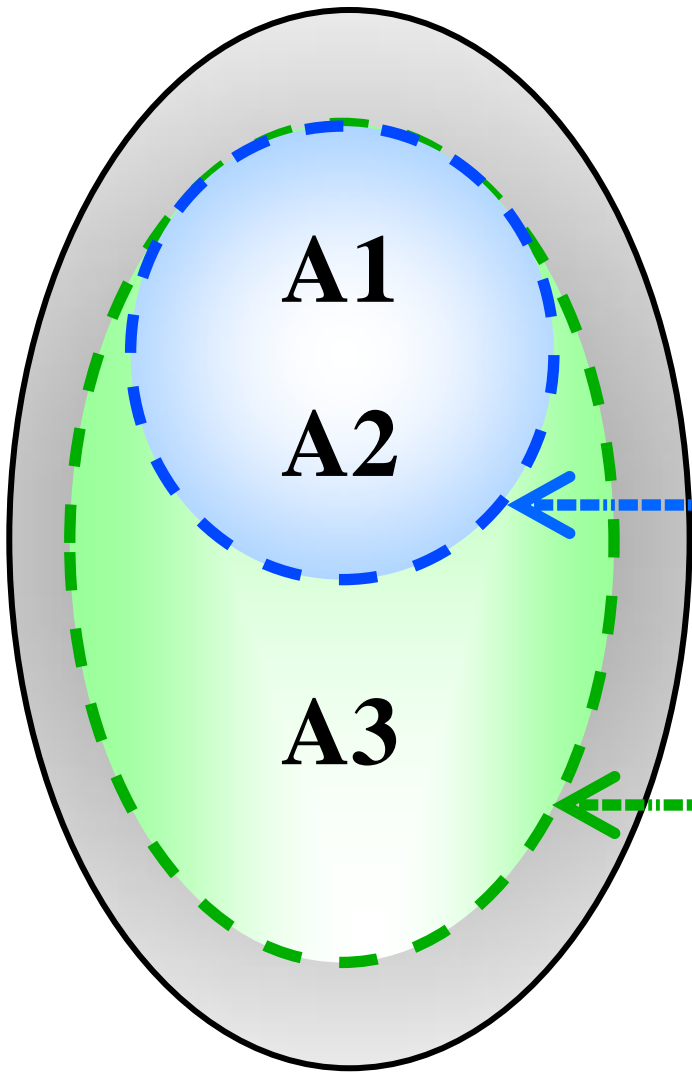

**Organism A**

## **Blast output of the protein A1**

**Hit1 : protein A1 : Organism A**

**Hit2 : protein A2 : Organism A**

*Hit3 : protein B1 : Organism B*

**Hit4 : protein A3 : Organism A**

**Hit5 : protein B2 : Organism B**

*Hit6 : protein C1 : Organism C*

**Hit7 : protein A4 : Organism A**

**Hit9 : protein B3 : Organism B**
