# Supplementary material for: OrthoInspector: comprehensive orthology analysis and visual exploration
Source: Springer Nature journal article supplement (doi:10.1186/1471-2105-12-11), 2011-01-10

Number of Sequences (x10<sup>3</sup>)

Number of Inparalog groups (x10<sup>3</sup>)

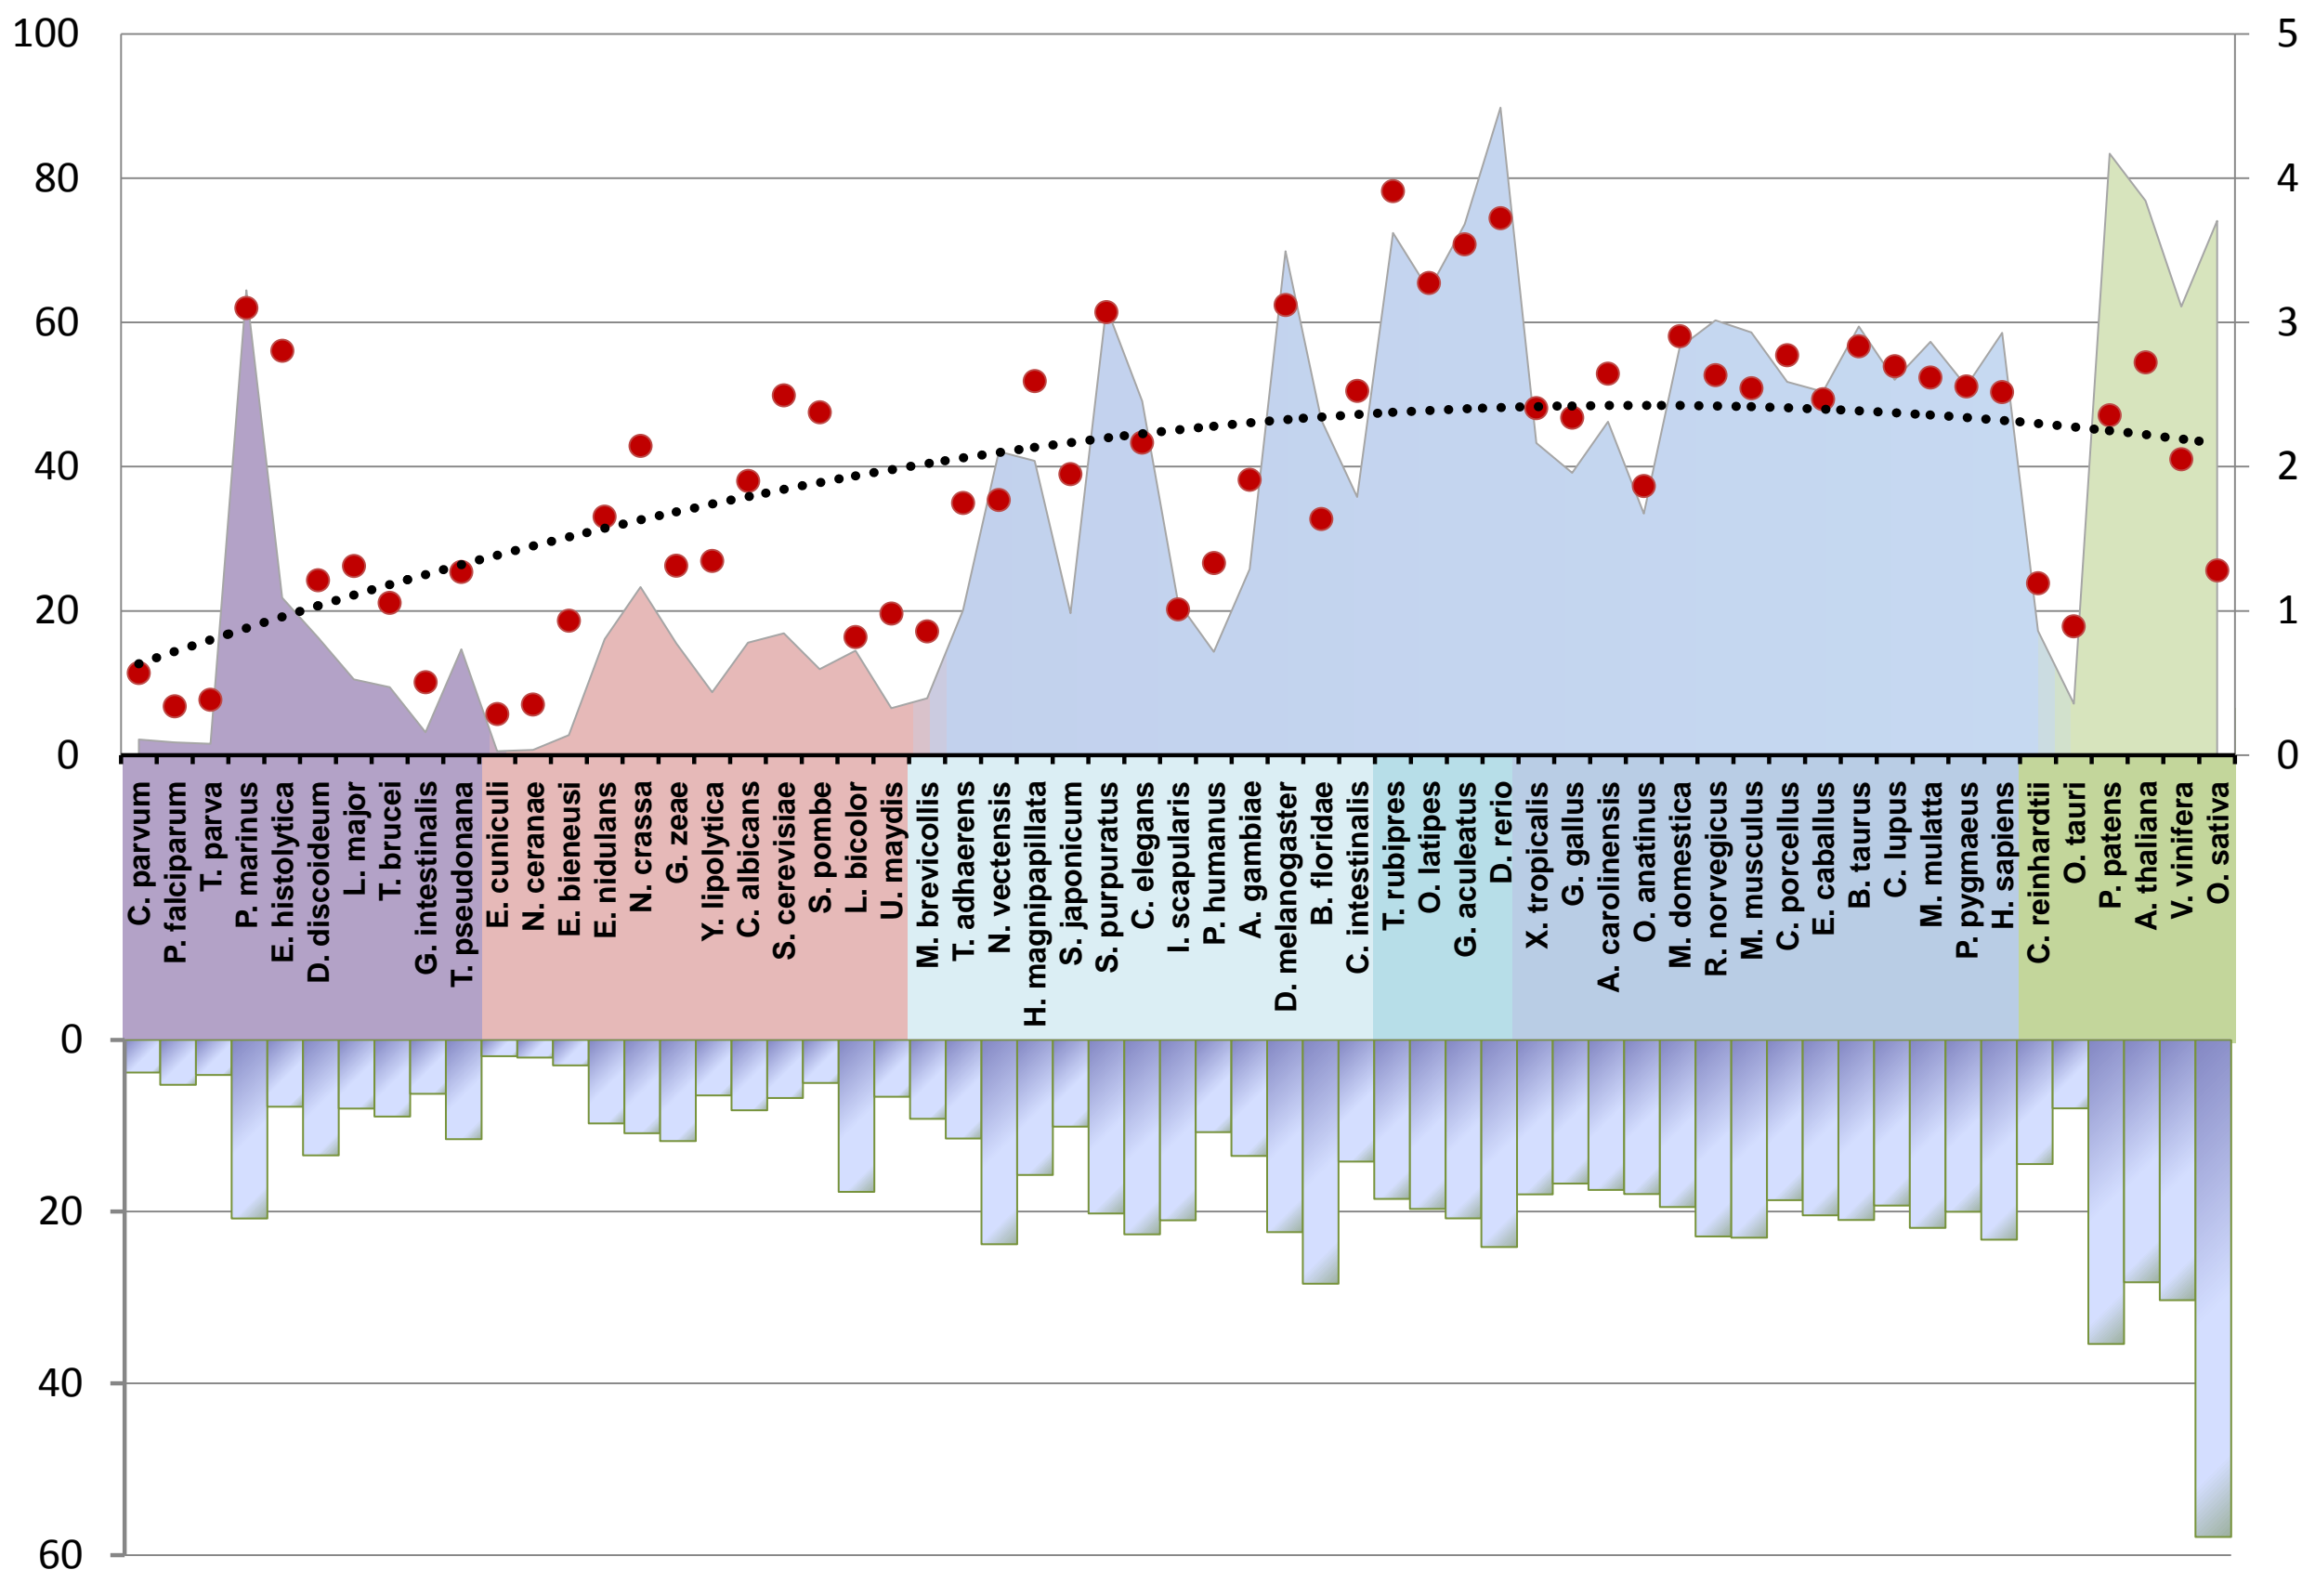

Supplement: 12859_2010_4328_MOESM8_ESM.pdf [file 12859_2010_4328_MOESM8_ESM.pdf]
