# Supplementary material for: OrthoInspector: comprehensive orthology analysis and visual exploration
Source: Springer Nature journal article supplement (doi:10.1186/1471-2105-12-11), 2011-01-10

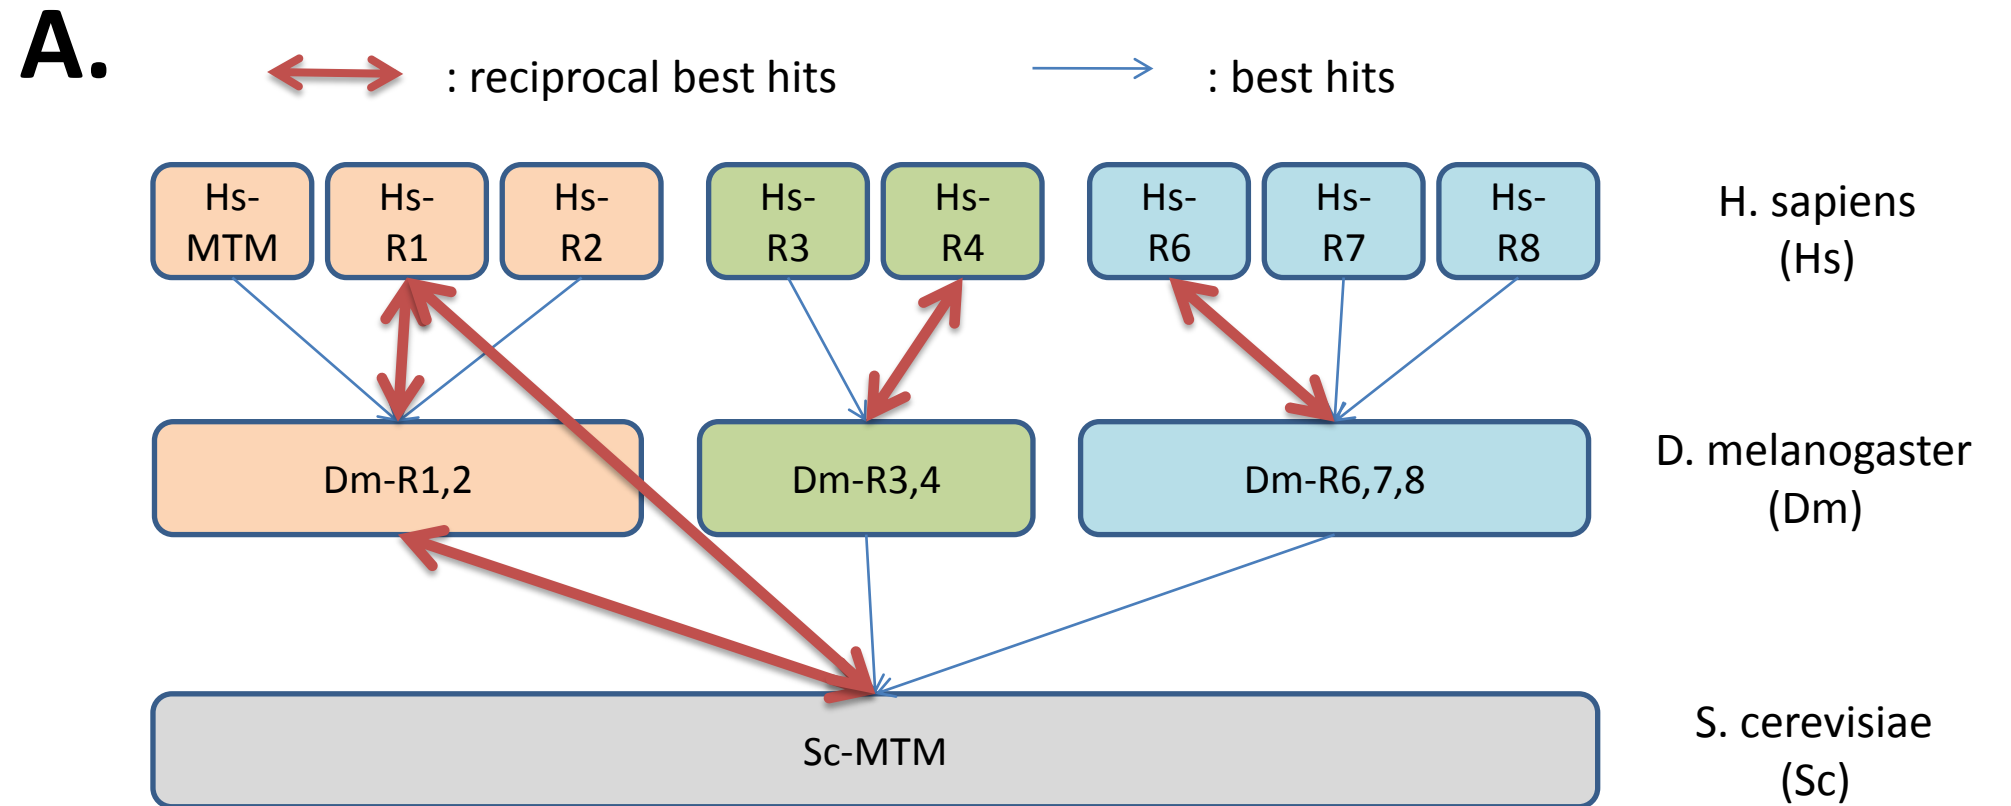

**B. Inparanoid**

**C. OrthoMCL**

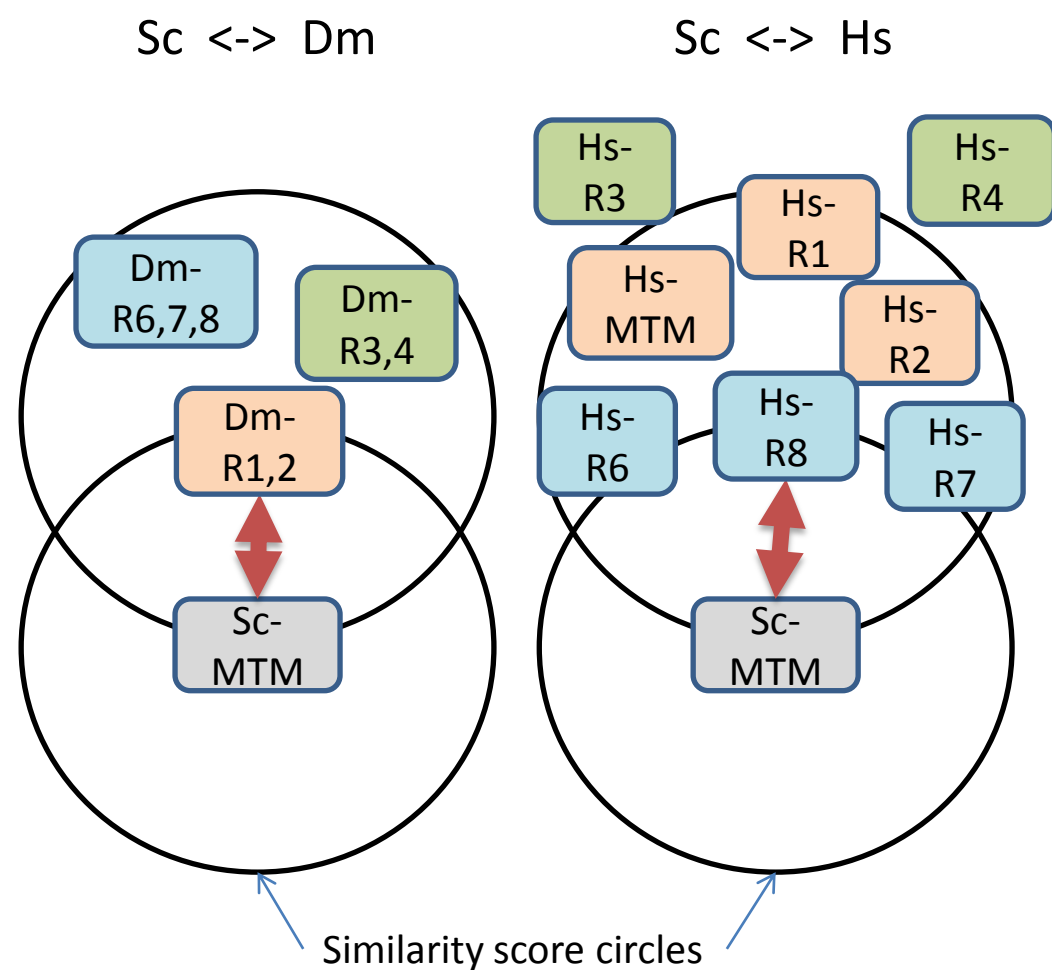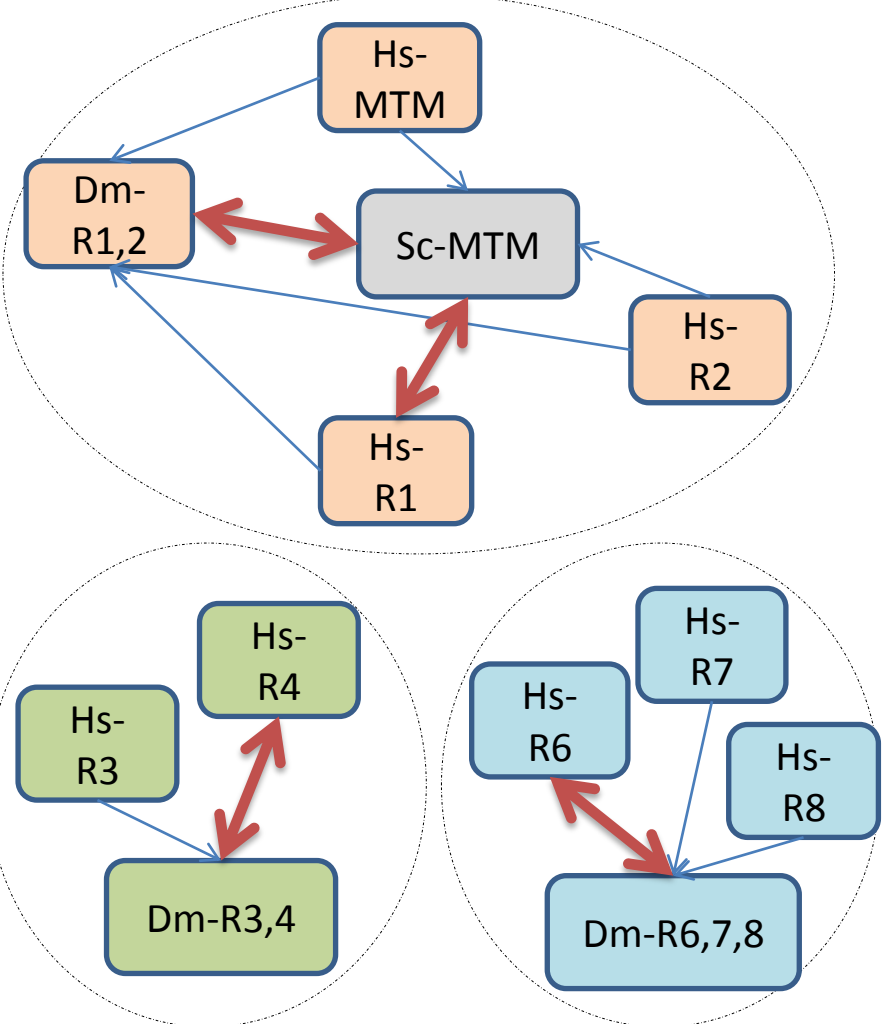

**D. OrthoInspector**

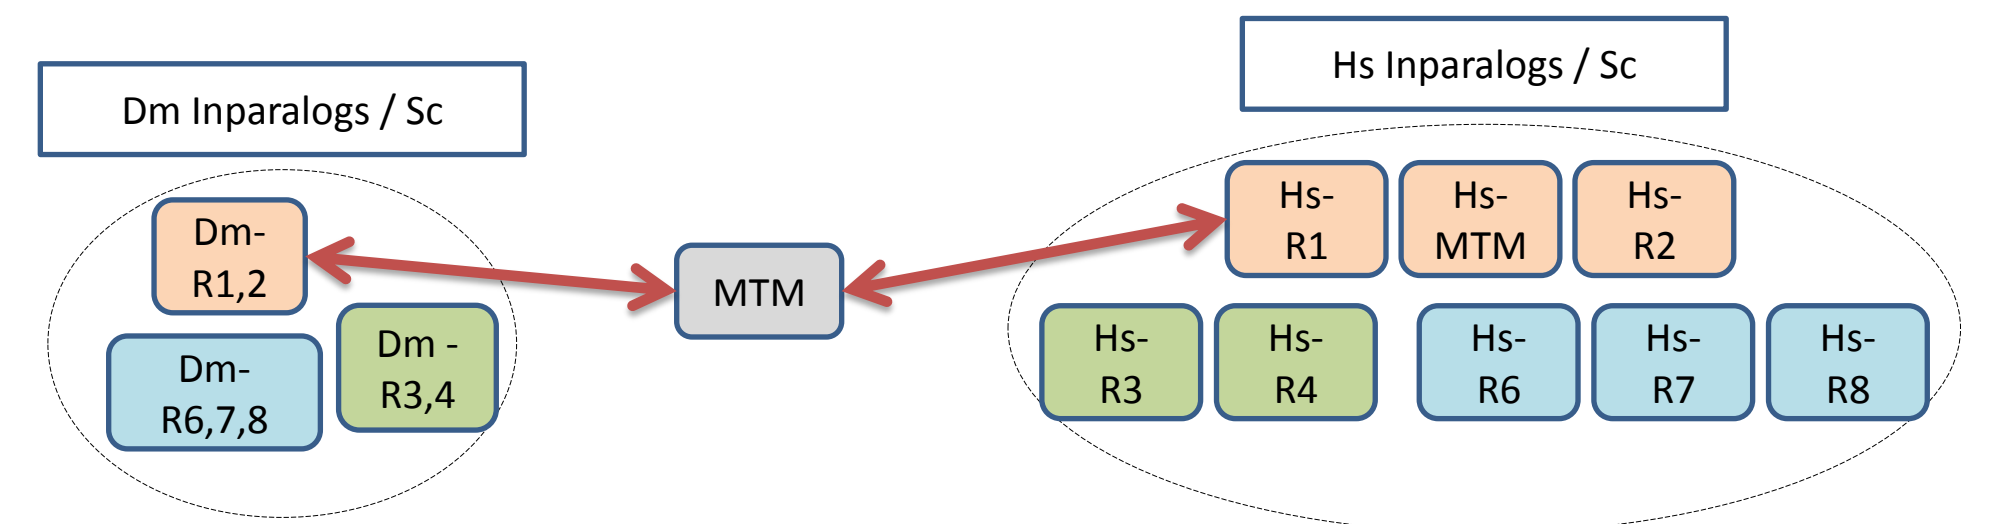

Supplement: 12859_2010_4328_MOESM10_ESM.pdf [file 12859_2010_4328_MOESM10_ESM.pdf]
