# Supplementary material for: OrthoInspector: comprehensive orthology analysis and visual exploration
Source: Springer Nature journal article supplement (doi:10.1186/1471-2105-12-11), 2011-01-10
Supplement: 12859_2010_4328_MOESM11_ESM.pdf [file 12859_2010_4328_MOESM11_ESM.pdf]

|                    | Benchmark | PPV  | Sn   | mean<br>PPV | mean<br>Sn |
|--------------------|-----------|------|------|-------------|------------|
| OMA                | A         | 0,93 | 0,48 | 0,91        | 0,56       |
|                    | B         | 0,89 | 0,42 |             |            |
|                    | C         | 0,87 | 0,69 |             |            |
|                    | D         | 0,95 | 0,65 |             |            |
| Inparanoid         | A         | 0,77 | 0,83 | 0,89        | 0,76       |
|                    | B         | 0,93 | 0,61 |             |            |
|                    | C         | 0,87 | 0,81 |             |            |
|                    | D         | 0,97 | 0,80 |             |            |
| OrthoMCL           | A         | 0,78 | 0,78 | 0,71        | 0,78       |
|                    | B         | 0,86 | 0,71 |             |            |
|                    | C         | 0,82 | 0,73 |             |            |
|                    | D         | 0,37 | 0,91 |             |            |
| OrthoInspector     | A         | 0,71 | 0,86 | 0,84        | 0,80       |
|                    | B         | 0,95 | 0,69 |             |            |
|                    | C         | 0,77 | 0,78 |             |            |
|                    | D         | 0,92 | 0,86 |             |            |
| Ensembl<br>Compara | A         | 0,90 | 0,87 | 0,79        | 0,81       |
|                    | B         | 0,74 | 0,77 |             |            |
|                    | C         | 0,67 | 0,80 |             |            |
|                    | D         | 0,85 | 0,80 |             |            |
| eggNOG             | A         | 0,83 | 0,96 | 0,66        | 0,88       |
|                    | B         | 0,69 | 0,79 |             |            |
|                    | C         | 0,78 | 0,85 |             |            |
|                    | D         | 0,33 | 0,92 |             |            |

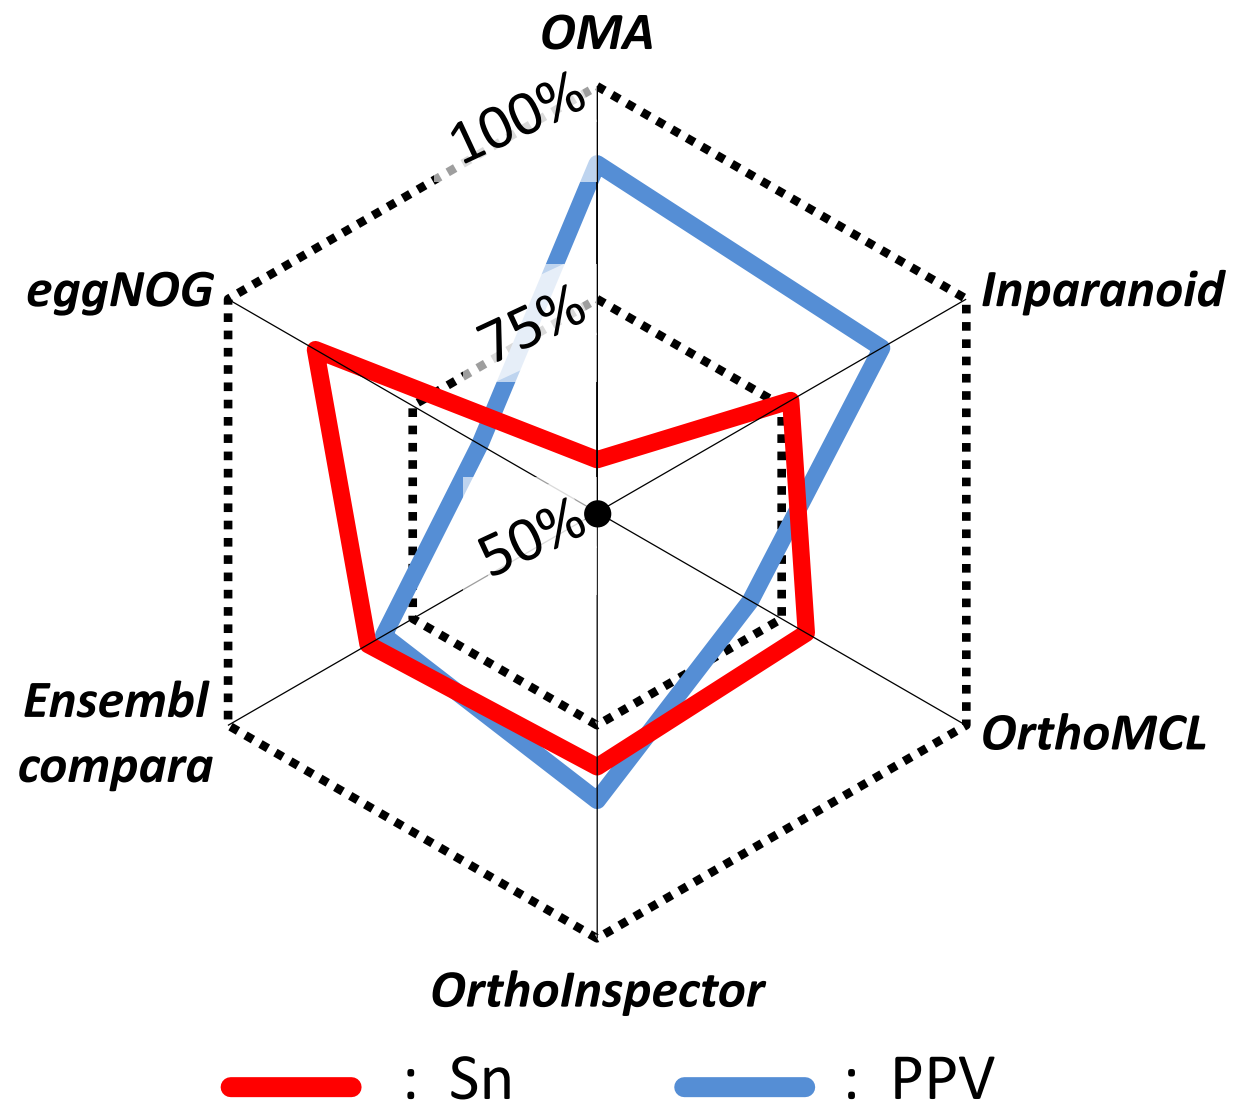

**A** : TKL kinases benchmark  
**B** : CMGC kinases benchmark  
**C** : Literature benchmark n°1 (Tim Hulsen & al, 2006)  
**D** : Literature benchmark n°2 (Austin L. Hughes,1998)
