# Supplementary material for: OrthoInspector: comprehensive orthology analysis and visual exploration
Source: Springer Nature journal article supplement (doi:10.1186/1471-2105-12-11), 2011-01-10
Supplement: 12859_2010_4328_MOESM12_ESM.pdf [file 12859_2010_4328_MOESM12_ESM.pdf]

**A.**

|                       | PRES.                            | ABS.                             | UNCAR.                           |
|-----------------------|----------------------------------|----------------------------------|----------------------------------|
| <i>H.sapiens</i>      | <input checked="" type="radio"/> | <input type="radio"/>            | <input type="radio"/>            |
| <i>M. musculus</i>    | <input checked="" type="radio"/> | <input type="radio"/>            | <input type="radio"/>            |
| <i>E. histolytica</i> | <input type="radio"/>            | <input type="radio"/>            | <input checked="" type="radio"/> |
| <i>P. falciparum</i>  | <input type="radio"/>            | <input checked="" type="radio"/> | <input type="radio"/>            |

**B.**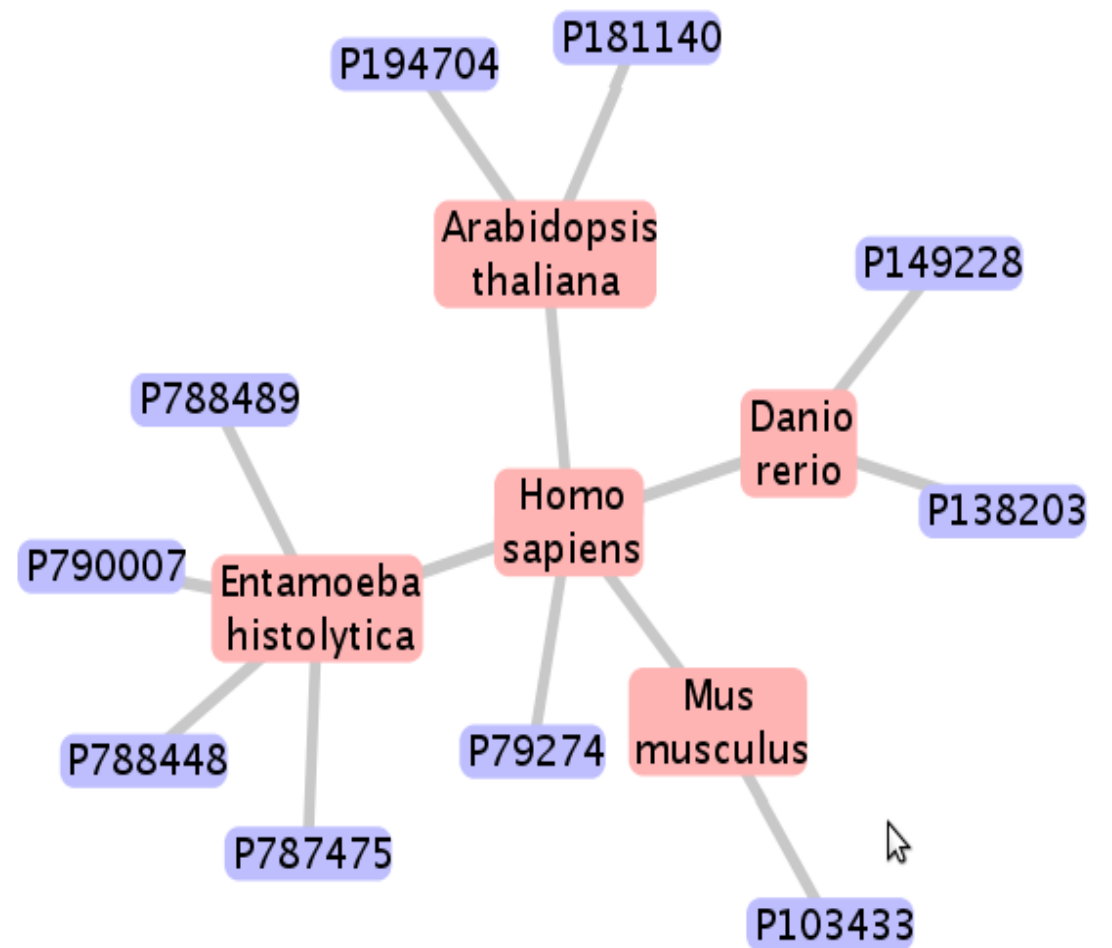**C.**

|                       |                                               |        |        |
|-----------------------|-----------------------------------------------|--------|--------|
| <i>H.sapiens</i>      | Query : Q9Y217                                | Q9Y216 | Q96EF0 |
| <i>M. musculus</i>    | Q8VE11                                        | Q9Z2C9 |        |
| <i>E. histolytica</i> | XP_653520 ; XP_654089 ; XP_648834 ; XP_655157 |        |        |
| <i>P. falciparum</i>  |                                               |        |        |
